# Supplementary material for: Dietary Patterns and Glucose Tolerance Abnormalities in Chinese Adults
Source: Oxford University Press journal article supplement (doi:10.2337/dc09-0714), 2009-08-12
Supplement: dc090714-sup-appendix_1-2.doc [file dc090714-sup-appendix_1-2.doc]

**Appendix 1: Factor Analysis Structure Matrix**

|  | **Component** | | | |
| --- | --- | --- | --- | --- |
| **1** | **2** | **3** | **4** |
| **YOGURT** | .666 | .109 | -.014 | .018 |
| **MILK** | .597 | .106 | .251 | -.026 |
| **BEVERGE** | .547 | -.093 | .085 | .096 |
| **CHEESE** | .544 | .122 | -.236 | -.018 |
| **JUICE** | .540 | -.020 | .197 | .077 |
| **BEEF/LAMB** | .497 | .093 | .439 | .237 |
| **CAKE** | .476 | .039 | .332 | .122 |
| **MILKPOWDER** | .435 | .114 | .091 | -.009 |
| **NUT** | .385 | .020 | .248 | .226 |
| **ORGAN MEAT** | .334 | -.215 | .249 | .319 |
| **DRYBEAN** | .318 | -.011 | .227 | .196 |
| **WHEAT** | .026 | .809 | .005 | -.007 |
| **RICE** | -.095 | -.788 | .080 | .126 |
| **OCEREAL** | .092 | .646 | .050 | .004 |
| **TUBERS** | -.003 | .530 | .051 | .107 |
| **FRIEDWHEAT** | .248 | .471 | .208 | .153 |
| **VEGETABLE** | -.121 | -.322 | .275 | .111 |
| **SEAFOOD** | .236 | -.408 | .605 | .161 |
| **FRUIT** | .257 | .172 | .595 | -.005 |
| **POULTY** | .364 | -.314 | .586 | .214 |
| **TOFUP** | .184 | .025 | .578 | .068 |
| **EGG** | .096 | .311 | .558 | .039 |
| **PORK** | .145 | -.369 | .519 | .170 |
| **DRYVEGETABLE** | -.041 | .120 | .272 | .252 |
| **BEER** | .121 | -.016 | .130 | .766 |
| **H ALCOHOL** | -.057 | .008 | .047 | .634 |
| **L ALCOHOL** | .033 | .003 | -.008 | .626 |
| **WINE** | .294 | .033 | .073 | .379 |
| Extraction Method: Principal Component Analysis. | | | | |
| Rotation Method: Oblimin with Kaiser Normalization. | | | | |

**Appendix 2: Final Cluster Centres in K-means Cluster procedure**

|  | **Cluster** | | | |
| --- | --- | --- | --- | --- |
|  | **1** | **2** | **3** | **4** |
| **RICE** | 3.37 | 1.56 | 1.97 | 2.46 |
| **WHEAT** | 1.56 | 3.29 | 2.90 | 2.39 |
| **OCEREAL** | 1.51 | 3.05 | 2.72 | 2.57 |
| **TUBERS** | 1.93 | 2.88 | 2.67 | 2.47 |
| **FRIEDWHEAT** | 1.59 | 2.41 | 2.76 | 2.81 |
| **PORK** | 2.73 | 1.70 | 2.69 | 3.03 |
| **BEEF/LAMB** | 1.97 | 1.69 | 3.24 | 3.18 |
| **POULTRY** | 2.53 | 1.48 | 2.90 | 3.16 |
| **ORGANMEAT** | 2.37 | 1.42 | 2.43 | 3.02 |
| **SEAFOD** | 2.68 | 1.49 | 2.80 | 3.10 |
| **MILK** | 1.09 | 1.13 | 2.41 | 2.37 |
| **MILKPOWDER** | 1.08 | 1.15 | 1.46 | 1.71 |
| **CHEESE** | 1.01 | 1.04 | 1.20 | 1.21 |
| **YOGURT** | 1.05 | 1.10 | 1.55 | 1.98 |
| **EGG** | 1.94 | 2.28 | 2.98 | 2.75 |
| **DRYBEAN** | 1.80 | 1.56 | 2.01 | 3.00 |
| **VEGETABLE** | 2.87 | 2.00 | 2.42 | 2.55 |
| **CAKE** | 1.90 | 1.75 | 2.65 | 3.41 |
| **FRUIT** | 1.98 | 2.07 | 2.98 | 3.05 |
| **NUTS** | 1.80 | 1.57 | 2.36 | 3.07 |
| **L ALCOHOL** | 1.31 | 1.21 | 1.27 | 1.53 |
| **H ALCOHOL** | 1.37 | 1.25 | 1.32 | 1.46 |
| **BEER** | 1.42 | 1.21 | 1.38 | 2.10 |
| **WINE** | 1.03 | 1.02 | 1.07 | 1.46 |
| **JUICE** | 1.29 | 1.24 | 1.36 | 3.37 |
| **BEVERAGE** | 1.42 | 1.18 | 1.36 | 3.13 |
| **DRYVEGETABLE** | 2.40 | 2.38 | 2.63 | 2.69 |
| **TOFU** | 2.22 | 1.97 | 2.80 | 2.97 |
